# Supplementary material for: Biodiversity at risk under future cropland expansion and intensification
Source: Springer Nature journal article supplement (doi:10.1038/s41559-017-0234-3), 2017-07-12
Supplement: MOESM2 [file 41559_2017_234_MOESM2_ESM.xlsx]

## Sheet: Table 2
Table 2: Land system conversions for each pathway *Classes 9 –13 (Mosaic cropland and grassland classes) no longer occur in our updated land systems classifications as we use the same decision tree from Van Assellen & Verburg 1 but with new datasets comprising of different, often higher, values.) ext: extensive, med. int = medium intensive, int = intensive, ls = livestock, bgs = bovine, goats & s…
Land Systems Name Key	Original Land System	Intensification Pathway Land System	Expansion Pathway Land System	Both (Expansion & Intensification) Pathway Land System
0. Cropland ext, few ls	VALUE 0	VALUE 6	-	VALUE 6
1. Cropland ext, bgs	VALUE 1	VALUE 7	-	VALUE 7
2. Cropland ext, pp	VALUE 2	VALUE 8	-	VALUE 8
3. Cropland m. int, few ls	VALUE 3	VALUE 6	-	VALUE 6
4. Cropland m. int, bgs	VALUE 4	VALUE 7	-	VALUE 7
5. Cropland m. int, pp	VALUE 5	VALUE 8	-	VALUE 8
6. Cropland int, few ls	VALUE 6	-	-	-
7. Cropland int, bgs	VALUE 7	-	-	-
8. Cropland int, pp	VALUE 8	-	-	-
9. Mosaic cropland and grassland, bgs	VALUE 9	VALUE 7	-	VALUE 7
10. Mosaic cropland and grassland, pp	VALUE 10	VALUE 8	-	VALUE 8
11. Mosaic cropland ext and grassland, few ls	VALUE 11	VALUE 6	-	VALUE 6
12. Mosaic cropland m. int and grassland, few ls	VALUE 12	VALUE 6	-	VALUE 6
13. Mosaic cropland int and grassland, few ls	VALUE 13	VALUE 6	-	VALUE 6
14. Mosaic cropland and forest, pp	VALUE 14	VALUE 8	-	VALUE 8
15. Mosaic cropland ext and open forest, few ls	VALUE 15	VALUE 6	-	VALUE 6
16. Mosaic cropland m. int and open forest, few ls	VALUE 16	VALUE 6	-	VALUE 6
17. Mosaic cropland int and open forest, few ls	VALUE 17	VALUE 6	-	VALUE 6
18. Dense forest	VALUE 18	-	VALUE 0	VALUE 6
19. Open forest, few ls	VALUE 19	-	VALUE 0	VALUE 6
20. Open forest, pp	VALUE 20	-	VALUE 1	VALUE 8
21. Mosaic grassland and open forest	VALUE 21	-	VALUE 0	VALUE 6
22. Mosaic grassland and bare	VALUE 22	-	VALUE 0	VALUE 6
23. Natural grassland	VALUE 23	-	VALUE 0	VALUE 6
24. Grassland, few ls	VALUE 24	-	VALUE 0	VALUE 6
25. Grassland, bgs	VALUE 25	-	VALUE 1	VALUE 7
26. Bare	VALUE 26	-	-	-
27. Bare,few ls	VALUE 27	-	VALUE 0	VALUE 6
28. Peri-urban & villages	VALUE 28	-	-	-
29. Urban	VALUE 29	-	-	-

## Sheet: Table 3
Table 3: Modelled mean estimates (following Newbold et al. 2) of relative percent biodiversity change for each Land System. Values represent the percentage of remaining biodiversity, expressed in terms of total species richness (SR) and abundance. All values are relative to an un-impacted baseline (primary vegetation, minimal intensity of use, zero human population density, and maximum observed d…
Land System	SR (CI)	Abundance (CI)
0. Cropland ext, few ls	71.85	80.8
	(62.65 – 82.35)	(62.60 - 104.20)
1. Cropland ext, bgs	68	77.25
	(57.4 – 80.7)	(56.65 - 105.70)
2. Cropland ext, pp	68	77.25
	(57.4 – 80.7)	(56.65 - 105.70)
3. Cropland med. Int, few ls	66.25	63.55
	(56.85 - 77.2)	(48.05 - 84.05)
4. Cropland med. int, bgs	62.4	60
	(51.6 - 75.55)	(42.10 - 85.55)
5. Cropland med. int, pp	62.4	60
	(51.6 - 75.55)	(42.10 - 85.55)
6. Cropland int, few ls	67.15	70.45
	(56.95 - 79.25)	(51.55 - 96.60)
7. Cropland int, bgs	63.3	66.9
	(51.7 - 77.6)	(45.60 - 98.10)
8. Cropland int, pp	63.3	66.9
	(51.7 - 77.6)	(45.60 - 98.10)
14. Mosaic cropland and forest, pp	63.3	66.9
	(51.7 - 77.6)	(45.60 - 98.10)
15. Mosaic cropland ext and open forest, few ls	71.85	80.8
	(62.65 - 82.35)	(62.60 - 104.20)
16. Mosaic cropland m. int and open forest, few ls	66.25	63.55
	(56.85 - 77.2)	(48.05 - 84.05)
17. Mosaic cropland int and open forest, few ls	67.15	70.45
	(56.95 - 79.25)	(51.55 - 96.60)
18. Dense forest	96.13	98.03
	(90.54 - 100.39)	(88.28 - 108.28)
19. Open forest, few ls	89.23	90.96
	(79.54 - 100.19)	(71.44 - 104.63)
20. Open forest, pp	88	97.56
	(75.34 - 102.92)	(70.81 - 122.80)
21. Mosaic grassland and open forest	96.13	98.03
	(90.54 - 100.39)	(88.28 - 108.28)
22. Mosaic grassland and bare	96.13	98.03
	(90.54 - 100.39)	(88.28 - 108.28)
23. Natural grassland	96.13	98.03
	(90.54 - 100.39)	(88.28 - 108.28)
24. Grassland, few ls	70.6	72.2
	(61.3 - 81.2)	(56.00 - 93.00)
25. Grassland, bgs	62.9	65.1
	(50.8 - 77.9)	(44.10 - 96.00)
27. Bare,few ls	70.6	72.2
	(61.3 - 81.2)	(56.00 - 93.00)
28. Peri-urban & villages	96	81.8
	(79.4 - 116)	(51.60 - 129.70)
29. Urban	49.8	37.6
	(37.5 - 66)	(21.10 - 67.20)

## Sheet: Table 4
Table 4: Modelled mean estimates of relative percent biodiversity change in terms of species richness and abundance according to agricultural development pathways (Both = intensification and expansion). Note: Minus numbers signify a gain in species richness and abundance, however, these land systems are generally located in areas that are of relatively low species richness and abundance. Mean 95%…
	Expansion (CI)				Intensification (CI)			Both (CI)
Land System	SR	Abundance			SR	Abundance		SR		Abundance
0. Cropland ext, few ls	-	-			6.54	12.81		6.54		12.81
					(3.7 - 9.10)	(7.29 - 17.65)		(3.7 - 9.10)		(7.29 - 17.65)
1. Cropland ext, bgs	-	-			6.91	13.4		6.91		13.4
					(3.84 - 9.93)	(7.19 - 19.51)		(3.84 - 9.93)		(7.19 - 19.51)
2. Cropland ext, pp	-	-			6.91	13.4		6.91		13.4
					(3.84 - 9.93)	(7.19 - 19.51)		(3.84 - 9.93)		(7.19 - 19.51)
3. Cropland m. int, few ls	-	-			-1.36	-10.86		-1.36		-10.86
					(-2.66 - -0.18)	(-14.93 - -7.28 )		(-2.66 - -0.18)		(-14.93 - -7.28 )
4. Cropland m. int, bgs	-	-			-1.44	-11.5		-1.44		-11.5
					(-2.71 - -0.19)	(-14.67 - -8.31)		(-2.71 - -0.19)		(-14.67 - -8.31)
5. Cropland m. int, pp	-	-			-1.44	-11.5		-1.44		-11.5
					(-2.71 - -0.19)	(-14.67 - -8.31)		(-2.71 - -0.19)		(-14.67 - -8.31)
6. Cropland int, few ls	-	-			-	-		-		-
7. Cropland int, bgs	-	-			-	-		-		-
8. Cropland int, pp	-	-			-	-		-		-
9. Mosaic cropland and grassland, bgs	-	-			-	-		-		-
10. Mosaic cropland and grassland, pp	-	-			-	-		-		-
11. Mosaic cropland ext and grassland, few ls	-	-			6.54	12.81		6.54		12.81
					(3.7-9.10)	(7.29-17.65)		(3.7-9.10)		(7.29-17.65)
12. Mosaic cropland m. int and grassland, few ls	-	-			-1.36	-10.86		-1.36		-10.86
					(-2.66 - -0.18)	(-14.93 - -7.28 )		(-2.66 - -0.18)		(-14.93 - -7.28 )
13. Mosaic cropland int and grassland, few ls	-	-			-	-		-		-
14. Mosaic cropland and forest, pp	-	-			-	-		-		-
15. Mosaic cropland ext and open forest, few ls	-	-			6.54	12.81		6.54		12.81
					(3.7-9.10)	(7.29-17.65)		(3.7-9.10)		(7.29-17.65)
16. Mosaic cropland m. int and open forest, few ls	-	-			-1.36	-10.86		-1.36		-10.86
					(-2.66 - -0.18)	(-14.93 - -7.28 )		(-2.66 - -0.18)		(-14.93 - -7.28 )
17. Mosaic cropland int and open forest, few ls	-	-			-	-		-		-
18. Dense forest	25.26	17.58			-	-		30.15		28.14
	(17.97 – 30.8)	(3.77 – 29.09)						(21.06 – 37.1)		(10.79 – 41.61)
19. Open forest, few ls	19.48	11.17			-	-		24.75		22.54
	(17.81 – 21.24)	(0.41 – 12.38)						(20.9 – 28.40)		(7.68 – 27.85)
20. Open forest, pp	22.73	20.81			-	-		28.07		31.42
	(21.59 – 23.82)	(13.93 – 32.69)						(24.6 – 31.38)		(20.11 – 35.6)
21. Mosaic grassland and open forest	25.26	17.58			-	-		30.15		28.14
	(17.97 – 30.8)	(3.77 – 29.09)						(21.06 – 37.1)		(10.79 – 41.61)
22. Mosaic grassland and bare	25.26	17.58			-	-		30.15		28.14
	(17.97 – 30.8)	(3.77 – 29.09)						(21.06 – 37.1)		(10.79 – 41.61)
23. Natural grassland	25.26	17.58			-	-		30.15		28.14
	(17.97 – 30.8)	(3.77 – 29.09)						(21.06 – 37.1)		(10.79 – 41.61)
24. Grassland, few ls	-1.77	-11.91			-	-		4.89		2.42
	(-1.42 - -2.20)	(-12.04 - -11.79)						(2.4 – 7.1)		(-3.87 – 7.95)
25. Grassland, bgs	-8.11	-18.66			-	-		-0.64		-2.76
	(-3.59 - -12.99)	(-10.10 - -28.46)						(0.39 - -1.77)		(-2.19 - -3.4)
26. Bare	-	-			-	-		-		-
27. Bare,few ls	-1.77	-11.91			-	-		4.89		2.42
	(-1.42 - -2.20)	(-12.04 - -11.79)						(2.4 – 7.1)		(-3.87 – 7.95)
28. Peri-urban & villages	-	-			-	-		-		-
29. Urban	-	-			-	-		-		-

## Sheet: Table 5
Table 5: Overlap of our top 10% of species at-risk areas with: protected areas (IUCN category I - VI) 3, Conservation International (CI) hotspots 4, Global 200 Ecoregions 5, and Last of the Wild 6. Global, realm and national level data given.
		Expansion at risk areas				Intensification at risk areas
		Protected Areas (category I - VI)	CI Hotspots	Global 200	Last of the Wild	Protected Areas (category I - VI)	CI Hotspots	Global 200	Last of the Wild
Global		0.36	0.05	0.75	0.6	0.1	0.36	0.35	0.01
Realm
Afrotropics		0.21	0.09	0.69	0.21	0.12	0.28	0.37	0.01
Antarctica		-	-	-	-	-	-	-	-
Australasia		-	-	-	-	-	-	-	-
Indomalay		0.15	1	0.2	0.41	0.03	0.36	0.11	0
Nearctic		-	-	-	-	-	-	-	-
Neotropics		0.43	0.03	0.77	0.78	0.09	0.86	0.3	0.04
Oceania		-	-	-	-	-	-	-	-
Palearctic*		-	-	-	-	0.72	1	1	0.01
Country	Country code
Angola	AGO	0.04	0	0.31	0.28	-	-	-	-
Belize	BLZ	0.22	1	0	0	-	-	-	-
Benin	BEN	-	-	-	-	0.18	0.04	0	0.02
Bolivia	BOL	0.29	0.08	0.86	0.54	0.01	0.03	1	0.2
Brazil	BRA	0.52	0.02	0.66	0.82	-	-	-	-
Burkina Faso	BFA	-	-	-	-	0.64	0	0	0.1
Burundi	BDI	-	-	-	-	0.06	0.4	0.79	0
Cambodia	KHM	-	-	-	-	0.09	1	0.89	0.02
Cameroon	CMR	0.11	0.1	0.64	0.15	0.18	0.01	0.39	0
Central African Republic	CAF	0.22	0	0.53	0.22	-	-	-	-
Chad	TCD	0.14	0	1	0.03	0.08	0	0.6	0
Colombia	COL	0.2	0.05	1	0.85	-	-	-	-
Congo	COG	0.16	0	0.76	0.58	-	-	-	-
Costa Rica	CRI	1	1	0	0	-	-	-	-
Ecuador	ECU	0.25	0.26	1	0.5	-	-	-	-
El Salvador	SLV	-	-	-	-	0.16	1	0.36	0
Equatorial Guinea	GNQ	0.18	0	1	0	-	-	-	-
Ethiopia	ETH	0.56	0.04	0.86	0.51	0.12	1	0.78	0.02
French Guiana	GUF	0.53	0	1	0.65	-	-	-	-
Gabon	GAB	0.2	0	0.92	0.64	-	-	-	-
Ghana	GHA	-	-	-	-	0.23	0.3	0.31	0.04
Guatemala	GTM	0.98	1	0	0.21	0.87	1	0	0
Guinea	GIN	0.03	0.13	0.13	0	-	-	-	-
Guyana	GUY	0.08	0	0.97	0.55	-	-	-	-
Honduras	HND	0	1	0	0	0.08	1	0.45	0
India	IND	-	-	-	-	0.02	0.12	0	0
Indonesia	IDN	0.15	1	0.18	0.42	-	-	-	-
Ivory Coast	CIV	0.17	0.12	0.12	0.01	0.22	0.83	0.83	0
Kenya	KEN	0.85	0	1	0.37	0.12	0.36	0.6	0.02
Liberia	LBR	0.14	0.99	0.99	0.03	-	-	-	-
Malawi	MWI	0.64	0	0	0.18	0.07	0	0.29	0.04
Malaysia	MYS	0	1	0.94	0	-	-	-	-
Mexico	MEX	0.77	1	0	0	0.04	1	0.12	0.01
Mozambique	MOZ	0.26	0.09	0	0.21	0	0	0	0
Myanmar (Burma)	MMR	-	-	-	-	0.02	1	0.01	0
Nepal	NPL	-	-	-	-	0.11	1	0.64	0
Nicaragua	NIC	0.78	1	0	0.1	0.2	1	0.22	0.01
Niger	NER	-	-	-	-	0.05	0	0	0.01
Nigeria	NGA	0.36	0.91	0.91	0	0.11	0.07	0.02	0
Panama	PAN	0.33	1	0.56	0.23	-	-	-	-
Paraguay	PRY	0.1	0	0.05	0.7	-	-	-	-
Peru	PER	0.26	0.02	1	0.83	-	-	-	-
Rwanda	RWA	0	1	1	0	0.09	0.32	0.45	0
Sierra Leone	SLE	0.13	0.87	0.87	0	0.03	0.85	0.85	0
South Africa	ZAF	0.96	0.97	0	0.37	0.02	0	0.01	0
Sudan	SDN	0.19	0.01	0.14	0.3	0.03	0	0.15	0
Suriname	SUR	0.16	0	1	0.74	-	-	-	-
Tanzania, United Republic of	TZA	0.74	0.14	0.99	0.09	0.08	0.13	0.85	0
Togo	TGO	-	-	-	-	0.08	0.17	0.17	0
Uganda	UGA	0.14	0.34	0.25	0.02	0.12	0.22	0.25	0.02
Venezuela	VEN	0.69	0	0.94	0.76	-	-	-	-
Vietnam	VNM	-	-	-	-	0.02	1	0	0
Dem. Rep. Congo	COD	0.13	0.1	0.74	0.09	0.24	0.83	0.54	0
Zambia	ZMB	0.38	0.04	0.79	0.27	-	-	-	-
Zimbabwe	ZWE	0.45	0.12	0	0	-	-	-	-
* The Palearctic, 100% overlap represents a small area (1385 sq. km) bordering with the Indomalay realm, it was therefore not included in the main manuscript

## Sheet: Table 6
Table 6: Top ten at risk countries in terms of highest average biodiversity loss for our three agricultural pathways (both – combination of expansion and intensification).
	Intensification		Expansion		Both
Top Ten	Species Richness	Abundance	Species Richness	Abundance	Species Richness	Abundance
1	Rwanda	Mayotte	Suriname	Rep. of Congo	Suriname	Rep. of Congo
2	Burundi	Haiti	Fr. Guiana	DRC	Fr. Guiana	DRC
3	Uganda	Rwanda	Guyana	Suriname	Guyana	Suriname
4	El Salvador	Moldova	R. Congo	Bahamas	R. Congo	Liberia
5	Togo	Ukraine	DRC	Gabon	DRC	C. African Rep.
6	Nigeria	Burundi	Liberia	Liberia	Liberia	Bahamas
7	Sierra Leone	El Salvador	Gabon	Fr. Guiana	Gabon	Gabon
8	Ivory Coast	St. Lucia	Zambia	C. African Rep.	Zambia	Fr. Guiana
9	Malawi	Barbados	Cameroon	Guyana	Cameroon	Zambia
10	Nicaragua	Uganda	Belize	Eq. Guinea	Belize	Guyana

## Sheet: Table 7
Table 7: National level biodiversity loss in terms of average species richness (SR) and % abundance loss for each of the three agricultural pathways. Also shown are the average % agricultural economic growth between 2009-2013 8, and conservation spending (per km2) 7.
Country	Country Code	Intensification (SR)	Intensification (% Abundance)	Expansion (SR)	Expansion (% Abundance)	Both (SR)	Both (% Abundance)	Average % Agriculture growth 2009-2013	Spending / Km2	LN Spend / km2
Afghanistan	AFG	3.74	2.4	-0.81	-3.25	7.35	3.25	9.77	5.57	1.72
Albania	ALB	7.5	4.25	1.5	-0.25	11	4.75	4.08	153.51	5.03
Algeria	DZA	1.1	0.72		-3.82	3.29	1.52	10.6	1.82	0.6
Angola	AGO	1.59	0.48	69.28	5.98	95.13	16.86	0	0.05	-3.02
Antigua and Barbuda	ATG	5	6	15	6	23	16	1.83	3857.41	8.26
Argentina	ARG	-0.53	-2	9.67	-0.87	15.92	1.2	1.65	13.91	2.63
Armenia	ARM	10	5	-1	-2	14.5	6	4.22	80.35	4.39
Australia	AUS	-0.15	-0.74	6.79	-1.38	13.66	2.36	4.31	68.44	4.23
Austria	AUT	0.2	-0.6	6.4	0.8	9	2	-1.48	1244.74	7.13
Azerbaijan	AZE	8.54	4.93	6	-1.32	21.36	8.25	3.52	10.63	2.36
Bahamas, The	BHS	0.2	0	42.8	13.13	53.07	22.87	-3.99	97.94	4.58
Bangladesh	BGD	1.07	-4.29	12.43	1.14	18	-1.36	3.91	61.33	4.12
Barbados	BRB	8	9	1	0	10	9	0	484.44	6.18
Belgium	BEL	0	0	10.5	2	14	4.5	-2.53	4671.03	8.45
Belize	BLZ	-0.5	-0.5	99.5	9	124.5	16	3.49	160.83	5.08
Benin	BEN	18.18	6.18	35.09	2.09	68.09	14.09	2.67	61.09	4.11
Bhutan	BTN	4.88	0.47	7.94	0.53	14.35	1.76	2.12	100.53	4.61
Bolivia	BOL	3.07	0.74	92.73	6.44	121.05	14.86	2.88	19.18	2.95
Bosnia and Herzegovina	BIH	9	4.77	8.54	1	20.62	8	-0.32	32.43	3.48
Botswana	BWA	0.24	0.07	1.59	-3.59	14.96	1.85	1.03	28.7	3.36
Brazil	BRA	-0.47	-1.26	97.46	6.81	124.38	13.91	2.78	21.35	3.06
Brunei	BRN	0	-1	63	6	76	9	1.96	897.91	6.8
Bulgaria	BGR	11.8	6.2	4.8	0.9	18	7.9	-4.26	44.66	3.8
Burkina Faso	BFA	10.59	4.18	-2.32	-7.05	29.41	6.73	2.07	21.99	3.09
Burma	MMR	3.29	-0.3	21.58	1.66	31.06	3.31	0	1.16	0.15
Burundi	BDI	45.67	10	16.33	1	66.67	12.33	3.54	78.23	4.36
Belarus	BLR	8.2	5.8	26.5	4.8	42.8	16.8	2.31	2.12	0.75
Cambodia	KHM	13.58	4.26	42.05	3.84	68.26	12.63	3.67	26.82	3.29
Cameroon	CMR	6.45	1.4	105.45	10.19	134.74	18.88	3.66	30.08	3.4
Canada	CAN	-0.17	-0.6	7.28	1.72	9	2.96	2.91	108.82	4.69
Central African Republic	CAF	1.82	0.65	99.55	12.08	125.8	23.18	-5.73	10.21	2.32
Chad, Claimed by Libya	TCD	1.9	0.81	1.45	-6.29	13.68	3.13	3.03	2.9	1.06
Chile	CHL	0.57	0.48	2.95	0.16	5	2.29	0.87	22.75	3.12
China	CHN	-0.51	-1.53	1.14	-0.86	2.42	-0.83	4.14	15.55	2.74
Colombia	COL	0.45	-0.36	88.7	5.78	115.6	12.89	2.13	59.87	4.09
Comoros	COM	4.5	8	0.5	0	5	8.5	1.69	28.49	3.35
Congo	COG	1.29	0.36	127.36	14.54	155.96	25.14	5	2.21	0.79
Congo, Dem. Rep.	ZAR	1.81	0.42	123.92	14.32	152.53	24.98	3	3.43	1.23
Costa Rica	CRI	-1.38	-2.13	60.38	4.38	74.63	6.38	1.86	609.38	6.41
Croatia	HRV	3.67	1.83	12	0.83	21.67	6.83	-5.68	282.48	5.64
Cuba	CUB	11.54	7.38	19.27	3.92	36.12	14.92	2.81	39.89	3.69
Cyprus	CYP	-0.8	-2.2	-0.2	-0.4	0	-2.2	1.76	306.67	5.73
Czech Republic	CZE	-0.38	-3.38	8.13	1.5	10	0.13	1.67	245.71	5.5
Denmark	DNK	0.13	0.13	3.5	0.38	5.13	1.88	1.92	178.04	5.18
Djibouti	DJI	0	0	-4.33	-7.67	12.67	1.67	0	0.09	-2.37
Dominica	DMA	1	1	3	1	5	3	2.63	3196.05	8.07
Dominican Republic	DOM	8.88	5.75	14.25	3.25	27.25	12.38	6.07	274.28	5.61
Ecuador	ECU	3.03	-0.3	70.63	6	89.93	10.67	3.48	89.07	4.49
Egypt	EGY	-0.14	-0.45	-1.05	-4.36	2.95	0.45	3.06	9.1	2.21
El Salvador	SLV	24.67	9.33	9.33	1	37	11.33	0.16	331.99	5.81
Equatorial Guinea	GNQ	3.5	1.5	95.75	10.5	118	18.25	0	3.01	1.1
Eritrea	ERI	2.09	0.64	-4.36	-6.64	12.36	2	0.72	1.73	0.55
Estonia	EST	2.14	1.14	35.43	7.14	47.71	16.57	6.35	373.66	5.92
Ethiopia	ETH	8.69	2.77	18.31	-1.08	41.66	7.47	6.51	5.89	1.77
Fiji	FJI	-0.33	-2.22	10.22	5.56	11.89	6.78	2.03	468	6.15
Finland	FIN	0.03	0.03	11.06	2.68	14.21	5.59	3.62	111.44	4.71
France	FRA	0.15	0.1	5.95	1.1	7.93	2.56	-0.74	866.06	6.76
French Guiana	GUF	0.14	0	171.71	13	205.57	21.14	NA	NA	NA
Gabon	GAB	1.42	0.38	118	13.25	142.92	22.13	-0.14	20.27	3.01
Georgia	GEO	5	2.63	5.38	-0.25	14.63	4.88	1.08	75.33	4.32
Germany	DEU	0.17	0.07	6.9	1.28	9.28	3.1	-5.55	288.12	5.66
Ghana	GHA	10.91	1.55	33.82	1.5	59.14	8.18	4.27	48.05	3.87
Greece	GRC	-0.9	-3.31	0.38	-0.1	0	-3.07	3.05	21.68	3.08
Greenland	GRL	0	0	0	0	0	0	0	NA	NA
Grenada	GRD	7	8	5	2	13	12	3.31	2991.43	8
Guatemala	GTM	11	1.18	47.91	4.45	70.64	9.45	3.65	290.9	5.67
Guinea	GIN	7.95	2.55	76.95	7.27	106.18	17.91	4.57	16.61	2.81
Guinea-Bissau	GNB	11.5	4.25	48.75	5.75	74.75	17	2.44	68.55	4.23
Guyana	GUY	-0.32	-0.41	149.32	11.09	182.36	19.05	2.45	3.59	1.28
Haiti	HTI	14.6	10.8	2.4	0.4	18.4	12	1.5	29.87	3.4
Honduras	HND	5.47	0.67	54.93	5	75.87	11.07	4.09	129.48	4.86
Hungary	HUN	0.14	-3.86	10.43	1.86	13.86	0.29	-4.75	459.57	6.13
Iceland	ISL	0	0	0	-0.11	0.02	0.02	1.26	272.04	5.61
India	IND	11.46	3.39	5.57	0.32	20.04	5.19	3.32	38.03	3.64
Indonesia	IDN	-1.13	-3.18	26.92	3.61	31.8	3.07	3.94	16.16	2.78
Iran	IRN	3.31	1.66	-1.78	-6.11	9.38	2.95	4.56	8.26	2.11
Iraq	IRQ	3.4	2.63	-2.31	-8.34	9.31	4.11	7.73	0	-8.38
Ireland	IRL	0.5	0.5	-1.92	-5.75	4.5	1.75	0.37	16.63	2.81
Israel	ISR	1	-1.75	-1.25	-2.75	4.75	-1	0	859.63	6.76
Italy	ITA	-0.78	-2.67	0.98	-0.11	1	-2.22	-0.11	18.13	2.9
Ivory Coast	CIV	20.66	6.03	60.45	5.45	97.66	17.1	0.88	15.72	2.75
Jamaica	JAM	0	0	15.2	3.6	18.4	6.2	5.19	239.17	5.48
Japan	JPN	0.07	-0.36	7.41	1.7	9.41	2.87	-1.16	0	0
Jordan	JOR	-0.13	-0.25	-3.25	-10	8.75	1.63	2.16	31.05	3.44
Kazakhstan	KAZ	0.95	0.06	-1.01	-6.58	9.51	2.23	4.38	1.48	0.4
Kenya	KEN	10.57	2.27	15.18	-4.31	52.78	6.8	3.7	67.09	4.21
Korea, Republic of	KOR	0.47	0.33	5.07	1.27	7.2	2.93	-0.16	847.5	6.74
Kuwait	KWT	0	0	-3.5	-9	10.5	1.5	2.1	0	0
Kyrgyzstan	KGZ	1.67	0.86	-1.33	-3.48	6.19	1.81	4.76	1.64	0.5
Laos	LAO	1.71	0	22.12	1.59	30.53	3.53	2.95	13.81	2.63
Latvia	LVA	6.5	4.38	26.13	5.25	39.5	15.13	3.14	49.72	3.91
Lebanon	LBN	-2	-4	0	0	-1	-4	5.7	43.78	3.78
Lesotho	LSO	5	2	-2.33	-2.67	9.67	2	2.74	63.89	4.16
Liberia	LBR	6.18	1.73	120.09	12.73	152.27	23.82	3.45	7.15	1.97
Libya	LBY	0.38	0.36	-0.89	-6.82	3.01	1.71	0	0.02	-4.09
Lithuania	LTU	11	7.6	15.4	2.8	30.6	14.2	2.01	61.53	4.12
Macedonia	MKD	7	4	4	-0.5	14.5	5.5	-3.17	51.14	3.93
Madagascar	MDG	3.69	2.17	17.53	-0.84	32.87	10.66	0	37.89	3.63
Malawi	MWI	19.33	5.08	63.83	4.5	102.83	15.17	4.31	46.59	3.84
Malaysia	MYS	-3.19	-4.13	31.55	2.81	34.91	0.62	2.43	28.21	3.34
Mali	MLI	2.07	0.86	-1.49	-5.96	9.39	2.22	12.03	2.69	0.99
Malta	MLT	1	1	0	0	1	1	0.87	2879.31	7.97
Mauritania	MRT	0.14	0.07	-0.97	-3.93	3.09	0.97	2.16	1.47	0.39
Mauritius	MUS	0	0	0	0	0	0	2.54	2582.33	7.86
Mexico	MEX	3.8	0.45	13.32	-0.71	27.58	4.01	0.87	48.06	3.87
Moldova	MDA	16.5	10.5	3	0.5	20.5	11.5	5.65	12.05	2.49
Mongolia	MNG	0.27	0.16	-1.15	-4.78	4.73	1.27	5.39	2.45	0.9
Montenegro	MNE	4	2	3	0	8	3	2.48	0.14	-1.93
Morocco	MAR	7.35	4.58	-0.98	-3.5	12.18	5.47	8.48	6.45	1.86
Mozambique	MOZ	5.76	2.15	77.93	7.83	106.69	18.96	3.67	16.9	2.83
Namibia	NAM	0.61	0.24	-1.17	-2.59	6.25	0.89	2.36	38.03	3.64
Nepal	NPL	16	3.78	1.85	0.08	19.22	4.2	3.05	87.93	4.48
Netherlands	NLD	0.43	0.14	-0.29	-1.71	3.43	1	0.43	27368.6	10.22
New Zealand	NZL	0	-0.03	5.61	-0.11	9.5	5.11	2.57	668.16	6.5
Nicaragua	NIC	19.16	3.86	53.56	3.95	87.79	12.03	1.32	42.52	3.75
Niger	NER	2.61	1.24	-1.02	-6.04	8.16	2.66	3.54	5.72	1.74
Nigeria	NGA	22.31	7.45	19.95	1.36	49.47	11.45	4.85	21.04	3.05
Norway	NOR	0.29	0.29	1.04	0.08	1.85	0.92	2.83	324.8	5.78
Oman	OMN	0.01	0	-1.56	-5.48	4.13	1.07	1.44	0.17	-1.8
Pakistan	PAK	4.44	-0.11	-0.74	-1.77	6.22	0.25	2.4	6.77	1.91
Panama	PAN	5.87	1.2	76.27	5.8	101.47	12.07	-2.66	237.1	5.47
Papua New Guinea	PNG	0.41	0.11	39.93	7	48.8	11.91	0	14.69	2.69
Paraguay	PRY	-1.16	-2.13	65	5.81	85.9	12.19	8.4	8.38	2.13
Peru	PER	1.47	0.4	94.92	6.4	115.65	11.42	3.11	17.22	2.85
Philippines	PHL	9.96	3.86	15.89	2.81	29.5	8.66	1.12	72.29	4.28
Poland	POL	9.97	6.83	11.31	2.52	24.14	11.52	4.44	129.52	4.86
Portugal	PRT	3.5	2	4.11	-0.06	10.56	4.06	0.06	777.83	6.66
Puerto Rico	PRI	2	1.2	13	3.2	17.6	6.8	NA	NA	NA
Qatar	QAT	0	0	-1.5	-6	4	1.5	3.69	31.71	3.46
Romania	ROM	8.86	5.33	8.57	1.33	20.05	8.52	4.54	7.68	2.04
Russia	RUS	1.83	1.24	9.02	1.9	13.58	5.49	1.5	4.52	1.51
Rwanda	RWA	51	10.5	24.5	1.5	82.5	13.5	5.42	456.88	6.12
Saudi Arabia	SAU	0.03	0	-1.79	-9.72	4.96	1.79	1.08	24.5	3.2
Senegal	SEN	6.8	1.05	14.75	-1.85	36.45	5.5	2.97	39.86	3.69
Sierra Leone	SLE	21.88	6.38	55.38	5	91.25	15.88	4.17	9.44	2.24
Slovakia	SVK	5.75	3	9.75	1.75	17.75	6.5	4.28	176.39	5.17
Slovenia	SVN	0.5	0	19	3.5	26	6.5	-2.68	157.88	5.06
Solomon Islands	SLB	0.14	0.05	14.48	5.05	17.81	8.48	0	2.41	0.88
Somalia	SOM	1.13	0.58	-0.27	-2.49	4.87	1.25	NA	NA	NA
South Africa	ZAF	3.4	0.33	7.83	-0.88	18.77	2.42	0.25	91	4.51
Spain	ESP	-1.47	-4.82	1.55	-0.23	1.23	-4.02	1.69	16	2.77
Sri Lanka	LKA	0.08	-3.54	27.38	3.77	34.54	3.77	4.39	161.45	5.08
St. Kitts and Nevis	KNA	4	6	14	7	21	17	0.04	750	6.62
St. Lucia	LCA	7	9	9	4	17	15	-5.78	2401.56	7.78
St. Vincent and the Grenadines	VCT	5	6	1	0	7	7	0.76	185.29	5.22
Sudan, Administered by Kenya	SDN	2.72	1.24	7.47	-7.27	25.11	5.23	2.63	1.21	0.19
Suriname	SUR	0.29	0	181.5	14.57	219.36	24.07	6.94	17.04	2.84
Swaziland	SWZ	10	2	68	4	103	14	2.22	55.35	4.01
Sweden	SWE	0.36	0.29	11.46	2.93	14.88	6.08	-1.66	305.79	5.72
Switzerland	CHE	0.25	0	6.25	0.5	9.5	2.5	-0.78	6237.94	8.74
Syria	SYR	4.11	1.89	-1.83	-6.28	9.44	3.22	0	3.52	1.26
Tajikistan	TJK	0.59	0.37	-0.81	-1.85	2.81	1	9.12	17.52	2.86
Tanzania, United Republic of	TZA	14.83	4.09	69.87	5.56	107	16.6	3.54	32.55	3.48
Thailand	THA	4.14	-1.2	14.74	0.9	24.76	1.58	1.87	134.37	4.9
Togo	TGO	24.6	8	26	1	62.6	13.4	-1.98	9.77	2.28
Trinidad and Tobago	TTO	2.75	0.75	65.75	7.25	84	14.25	-2.54	344.11	5.84
Tunisia	TUN	6.9	4.45	-1.05	-5.35	12.75	5.8	2.46	59.82	4.09
Turkey	TUR	8.89	4.88	1.7	-0.26	12.25	5.88	3.71	21.14	3.05
Turkmenistan	TKM	0.71	0.47	-3.12	-9.17	9.64	2.29	0	0.51	-0.68
Uganda	UGA	36.05	8.43	35.86	2	84.1	13.81	2.37	101.12	4.62
Ukraine	UKR	15.11	10.18	4.51	0.8	20.96	12.11	5.16	60.32	4.1
United Arab Emirates	ARE	0	0	-3.11	-10.54	9.04	1.93	-3.31	0	0
United Kingdom	GBR	0.27	0.31	0.07	-1.87	3.07	1.49	-0.46	2681.6	7.89
United States	USA	-1.02	-2.6	12.85	1.68	16.52	1.96	3.87	789.72	6.67
Uruguay	URY	4.29	1.82	-6.82	-8.53	15.76	3.12	3.26	37.95	3.64
Uzbekistan	UZB	1.8	1.25	-1.66	-5.2	7.23	2.36	6.58	1.27	0.24
Vanuatu	VUT	2.15	3.23	11.85	5.46	17	14	3.71	21.53	3.07
Venezuela	VEN	0.84	-0.08	69.85	3.38	96.8	10.78	0.28	26.65	3.28
Vietnam	VNM	-0.75	-3.25	9.13	0.71	11.23	-1.58	2.44	78.72	4.37
Western Samoa	WSM	0	0	0	0	0	0	-4.11	120.07	4.79
Yemen	YEM	0.45	0.43	-1.61	-7.35	5.16	1.84	0	1.89	0.64
Zambia	ZMB	2.84	0.77	105.16	7.61	141.95	19.23	1.08	22.8	3.13
Zimbabwe	ZWE	11	3.22	29.66	-1.78	67.09	10.25	7.18	NA	NA

## Sheet: References
References
1	van Asselen, S. & Verburg, P. H. A Land System representation for global assessments and land-use modeling. Global Change Biology 18, 3125–3148, doi:10.1111/j.1365-2486.2012.02759.x (2012).
2	Newbold, T. et al. Global effects of land use on local terrestrial biodiversity. Nature 520, 45-50, doi:10.1038/nature14324
3	UNEP-WCMC. The World Database on Protected Areas (WDPA). In: (ed. I.A. Unep-Wcmc), Cambridge, UK: UNEP-WCMC. (2016).
4	Mittermeier, R.A., Patricio, R.G., Hoffman, M., Pilgrim, J., Brooks, T., Mittermeier, C.G., Lamoreux, J. & da Fonseca, G.A.B. Hotspots Revisited CEMEX, Mexico City, Mexico. (2004).
5	Olson, D. M. & Dinerstein, E. The Global 200: Priority Ecoregions for Global Conservation. Annals of the Missouri Botanical Garden 89, 199-224, doi:10.2307/3298564 (2002).
6	Sanderson, E. W. et al. The human footprint and the last of the wild. Bioscience 52, 891-904 (2002).
7	Waldron, A. et al. Targeting global conservation funding to limit immediate biodiversity declines. Proc Natl Acad Sci U S A 110, 12144-12148, doi:10.1073/pnas.1221370110 (2013).
8	World Bank Group. World Development Indicators. (World Bank Publications, 2013).
9	Robinson, T. P. et al. Mapping the Global Distribution of Livestock. PLoS ONE 9, e96084, doi:10.1371/journal.pone.0096084 (2014).
